# Supplementary material for: Hereditary Hyperferritinemia Cataract Syndrome: Ferritin L Gene and Physiopathology behind the Disease—Report of New Cases
Source: MDPI journal article supplement (doi:10.3390/ijms22115451), 2021-05-21
Supplement: s1 [file s1]

# Hereditary Hyperferritinemia Cataract Syndrome: Ferritin L Gene and Physiopathology behind the Disease – Report of New Cases

Table S1. Reported mutations in HHCS disease.

| N  | HGVS Nomenclature                         | Mutation Type  | Mutation Position                                             | First Publication | Old Nomenclature                                  |
|----|-------------------------------------------|----------------|---------------------------------------------------------------|-------------------|---------------------------------------------------|
| 1  | c.-216C>A                                 | IRE regulatory | Promoter <i>FTL</i>                                           | [1]               | NA                                                |
| 2  | c.-193C>G + c.-160A>G                     | IRE regulatory | lower stem + hexanucleotide loop                              | [2]               | +7C>G & +40A>G                                    |
| 3  | c.-190C>T                                 | IRE regulatory | lower stem                                                    | [3]               | +10C>U                                            |
| 4  | c.-186C>G                                 | IRE regulatory | lower stem                                                    | [4]               | +14C>G                                            |
| 5  | c.-184C>T                                 | IRE regulatory | lower stem                                                    | [3]               | +16C>U                                            |
| 6  | c.-182C>T + c.-178T>G                     | IRE regulatory | lower stem                                                    | [5]               | Paiva-2 + 18C>U & 22U>G                           |
| 7  | c.-176T>C                                 | IRE regulatory | lower stem                                                    | [6]               | +24U>C                                            |
| 8  | c.-171C>G                                 | IRE regulatory | lower stem                                                    | [7]               | Torino +29C>G                                     |
| 9  | c.-168G>A                                 | IRE regulatory | lower stem                                                    | [5]               | Pavia-1 +32G>A                                    |
| 10 | c.-168G>C                                 | IRE regulatory | lower stem                                                    | [8]               | Baltimore-1 +32G>C                                |
| 11 | c.-168G>T                                 | IRE regulatory | lower stem                                                    | [9]               | Paris-2 or Milano-1 +32G>U                        |
| 12 | c.-167C>A                                 | IRE regulatory | C bulge                                                       | [10]              | Paris +33C>A                                      |
| 13 | c.-167C>T                                 | IRE regulatory | C bulge                                                       | [11]              | Madrid or Philadelphia +33C>U                     |
| 14 | c.-166T>C                                 | IRE regulatory | upper stem                                                    | [12]              | Paris +34U>C                                      |
| 15 | c.-164C>A                                 | IRE regulatory | upper stem                                                    | [13]              | London-2 +36C>A                                   |
| 16 | c.-164C>G                                 | IRE regulatory | upper stem                                                    | [3]               | Milano +36C>G                                     |
| 17 | c.-164C>T                                 | IRE regulatory | upper stem                                                    | [14]              | Badalona +36C>U                                   |
| 18 | c.-163A>C                                 | IRE regulatory | upper stem                                                    | [15]              | Pavia +37A>C                                      |
| 19 | c.-163A>G                                 | IRE regulatory | upper stem                                                    | [3]               | Milano +37A>G                                     |
| 20 | c.-163A>T                                 | IRE regulatory | upper stem                                                    | [16]              | Zaragoza +37A>U                                   |
| 21 | c.-161C>A                                 | IRE regulatory | hexanucleotide loop                                           | [17]              | Geelong +39C>A                                    |
| 22 | c.-161C>G                                 | IRE regulatory | hexanucleotide loop                                           | [18]              | Paris +39C>G                                      |
| 23 | c.-161C>T                                 | IRE regulatory | hexanucleotide loop                                           | [13]              | London-1 +39C>U                                   |
| 24 | c.-160A>G                                 | IRE regulatory | hexanucleotide loop                                           | [19]              | Paris-1 or Montpellier-1 +40A>G                   |
| 25 | c.-160A>G + c.-159G>C                     | IRE regulatory | hexanucleotide loop                                           | [4]               | Paris-1 or Montpellier-1 +40A>G & Verona-1 +41G>C |
| 26 | c.-159G>C                                 | IRE regulatory | hexanucleotide loop                                           | [20]              | Verona-1 +41G>C                                   |
| 27 | c.-157G>A                                 | IRE regulatory | hexanucleotide loop                                           | [21]              | Salt Lake City +43G>A                             |
| 28 | c.-154T>G                                 | IRE regulatory | upper stem                                                    | [22]              | +46U>G                                            |
| 29 | c.-153G>A                                 | IRE regulatory | upper stem                                                    | [12]              | Paris +47G>A                                      |
| 30 | c.-151A>C                                 | IRE regulatory | lower stem                                                    | [2]               | +49A>C                                            |
| 31 | c.-151A>G                                 | IRE regulatory | lower stem                                                    | [23]              | Ghent +49A > G                                    |
| 32 | c.-150C>A                                 | IRE regulatory | lower stem                                                    | [24]              | +50C>A                                            |
| 33 | c.-149G>C                                 | IRE regulatory | lower stem                                                    | [25]              | Torino +51G>C                                     |
| 34 | c.-148G>C                                 | IRE regulatory | lower stem                                                    | [14]              | Heidelberg +52G>C                                 |
| 35 | c.-144A>T                                 | IRE regulatory | lower stem                                                    | [15]              | Paris +56A>U                                      |
| 36 | c.-110C>T                                 | IRE regulatory | 5' UTR                                                        | [3]               | +90C>U                                            |
| 37 | c.-220_-196del25                          | IRE regulatory | new transcription starting site (resulting IRE lacks nt 1-24) | [26]              | NA                                                |
| 38 | c.-190-162del29                           | IRE regulatory | eliminating IRE                                               | [27]              | Verona-2 +10_38del29                              |
| 39 | c.-182_-174 delCGGGTCTGT insAGGGGCCCGG \$ | IRE regulatory | eliminating part of lower stem                                | [28]              | +18_+26 delCGGGTCTGT insAGGGGCCCGG                |
| 40 | c.-178_-173del6                           | IRE regulatory | eliminating part of lower stem                                | [29]              | +22_27del6                                        |
| 41 | c.-168_-165delGCTT                        | IRE regulatory | eliminating C bulge                                           | [30]              | +32_35delGCTT                                     |
| 42 | c.-164_158del7                            | IRE regulatory | eliminating part of hexanucleotide loop                       | [31]              | Esplugues +36_42d                                 |
| 43 | c.-161delC                                | IRE regulatory | eliminating IRE                                               | [32]              | +39delC                                           |
| 44 | c.-162_-161delCA                          | IRE regulatory | eliminating part of hexanucleotide loop                       | [33]              | +38_39del AC                                      |
| 45 | c.-158_-143del16                          | IRE regulatory | eliminating part of hexanucleotide loop                       | [33]              | +42_57del16                                       |

|    |                           |                |                                |      |                  |
|----|---------------------------|----------------|--------------------------------|------|------------------|
| 46 | c.-153_-152<br>delGGinsCT | IRE regulatory | eliminating part of upper stem | [34] | +47_48delGGinsCT |
| 47 | c.-44delT                 | IRE regulatory | eliminating IRE                | [3]  | +176delT         |

## References

1. Faniello, M.C.; Di Sanzo, M.; Quaresima, B.; Nisticò, A.; Fregola, A.; Grosso, M.; Cuda, G.; Costanzo, F. Bilateral cataract in a subject carrying a C to A transition in the L ferritin promoter region. *Clin. Biochem.* **2009**, *42*, 911–914.
2. Castiglioni, E.; Soriani, N.; Girelli, D.; Camaschella, C.; Spiga, I.; Della Porta, M.G.; Ferrari, M.; Cremonesi, L. High resolution melting for the identification of mutations in the iron responsive element of the ferritin light chain gene. *Clin. Chem. Lab. Med.* **2010**, *48*, 1415–1418.
3. Cremonesi, L.; Paroni, R.; Foglieni, B.; Galbiati, S.; Fermo, I.; Soriani, N.; Belloli, S.; Ruggeri, G.; Biasiotto, G.; Cazzola, M.; et al. Scanning mutations of the 5'UTR regulatory sequence of L-ferritin by denaturing high-performance liquid chromatography: Identification of new mutations. *Br. J. Haematol.* **2003**, *121*, 173–179.
4. Cremonesi, L.; Fumagalli, A.; Soriani, N.; Ferrari, M.; Levi, S.; Belloli, S.; Ruggeri, G.; Arosio, P. Double-gradient denaturing gradient gel electrophoresis assay for identification of L-ferritin iron-responsive element mutations responsible for hereditary hyperferritinemia-cataract syndrome: Identification of the new mutation C14G. *Clin. Chem.* **2001**, *47*, 491–497.
5. Cazzola, M.; Bergamaschi, G.; Tonon, L.; Arbustini, E.; Grasso, M.; Vercesi, E.; Barosi, G.; Bianchi, P.E.; Cairo, G.; Arosio, P. Hereditary hyperferritinemia-cataract syndrome: Relationship between phenotypes and specific mutations in the iron-responsive element of ferritin light-chain mRNA. *Blood* **1997**, *90*, 814–821.
6. Rüfer, A.; Howell, J.P.; Lange, A.P.; Yamamoto, R.; Heuscher, J.; Gregor, M.; Wuillemin, W.A. Hereditary hyperferritinemia-cataract syndrome (HHCS) presenting with iron deficiency anemia associated with a new mutation in the iron responsive element of the L ferritin gene in a Swiss family. *Eur. J. Haematol.* **2011**, *87*, 274–278.
7. Bosio, S.; Campanella, A.; Gramaglia, E.; Porporato, P.E.; Longo, F.; Cremonesi, L.; Levi, S.; Camaschella, C. C29G in the iron-responsive element of L-ferritin: A new mutation associated with hyperferritinemia-cataract. *Blood Cells Mol. Dis.* **2004**, *33*, 31–34.
8. Kato, G.J.; Casella, F. L-ferritin-Baltimore-1: A novel mutation in the iron response element (C32G) as a cause of the hyperferritinemia-cataract syndrome. *Blood* **1999**, *94*, 407a.
9. Martin, M.E.; Fargion, S.; Brissot, P.; Pellat, B.; Beaumont, C. A point mutation in the bulge of the iron-responsive element of the L ferritin gene in two families with the hereditary hyperferritinemia-cataract syndrome. *Blood* **1998**, *91*, 319–323.
10. Durupt, S.; Durieu, I.; Salles, B.; Beaumont, C.; Hot, A.; Rousset, H.; Vital Durand, D. A potential etiology of elevated ferritin: Hyperferritinemia-cataract syndrome. *Rev. Med. Interne* **2001**, *22*, 83–85.
11. Balas, A.; Aviles, M.J.; Garcia-Sanchez, F.; Vicario, J.L. Description of a new mutation in the L-ferrin iron-responsive element associated with hereditary hyperferritinemia-cataract syndrome in a Spanish family. *Blood* **1999**, *93*, 4020–4021.
12. Hetet, G.; Devaux, I.; Soufir, N.; Grandchamp, B.; Beaumont, C. Molecular analyses of patients with hyperferritinemia and normal serum iron values reveal both L ferritin IRE and 3 new ferroportin (slc11A3) mutations. *Blood* **2003**, *102*, 1904–1910.
13. Mumford, A.D.; Vulliamy, T.; Lindsay, J.; Watson, A. Hereditary hyperferritinemia-cataract syndrome: Two novel mutations in the L-ferritin iron-responsive element. *Blood* **1998**, *91*, 367–368.
14. Luscieti, S.; Tolle, G.; Aranda, J.; Campos, C.B.; Risse, F.; Morán, É.; Muckenthaler, M.U.; Sánchez, M. Novel mutations in the ferritin-L iron-responsive element that only mildly impair IRP binding cause hereditary hyperferritinaemia cataract syndrome. *Orphanet J. Rare Dis.* **2013**, *8*, 30.
15. Ferrari, F.; Foglieni, B.; Arosio, P.; Camaschella, C.; Daraio, F.; Levi, S.; Garcia Erce, J.A.; Beaumont, C.; Cazzola, M.; Ferrari, M.; et al. Microelectronic DNA chip for hereditary hyperferritinemia cataract syndrome, a model for large-scale analysis of disorders of iron metabolism. *Hum. Mutat.* **2006**, *27*, 201–208.
16. García Erce, J.A.; Cortés, T.; Cremonesi, L.; Cazzola, M.; Pérez-Lungmus, G.; Giral, M. Hyperferritinemia-cataract syndrome associated to the HFE gene mutation. Two new Spanish families and a new mutation (A37T: “Zaragoza”). *Med. Clin.* **2006**, *127*, 55–58.
17. McLeod, J.L.; Craig, J.; Gumley, S.; Roberts, S.; Kirkland, M.A. Mutation spectrum in Australian pedigrees with hereditary hyperferritinaemia-cataract syndrome reveals novel and de novo mutations. *Br. J. Haematol.* **2002**, *118*, 1179–1182.
18. Garderet, L.; Hermelin, B.; Gorin, N.C.; Rosmorduc, O. Hereditary hyperferritinemia-cataract syndrome: A novel mutation in the iron-responsive element of the L-ferritin gene in a French family. *Am. J. Med.* **2004**, *117*, 138–139.
19. Beaumont, C.; Leneuve, P.; Devaux, I.; Scoazec, J.-Y.; Berthier, M.; Loiseau, M.-N.; Grandchamp, B.; Bonneau, D. Mutation in the iron responsive element of the L ferritin mRNA in a family with dominant hyperferritinaemia and cataract. *Nat. Genet.* **1995**, *11*, 444–446.
20. Meneses, F.G.A.; Schnabel, B.; Silva, I.D.C.G.; Alberto, F.L.; Toma, L.; Nader, H.B.; Lopes, C.C. Identification of the mutations associated with hereditary hyperferritinemia cataract syndrome and hemochromatosis in a Brazilian family. *Clin. Genet.* **2011**, *79*, 189–192.
21. Phillips, J.D.; Warby, C.A.; Kushner, J.P. Identification of a novel mutation in the L-ferritin IRE leading to hereditary hyperferritinemia-cataract syndrome. *Am. J. Med. Genet. A* **2005**, *134A*, 77–79.
22. Messa, E.; Pellegrino, R.; Palmieri, A.; Carturan, S.; Cilloni, D.; Saglio, G.; Roetto, A. Identification of a novel mutation in the L ferritin iron-responsive element causing hereditary hyperferritinemia-cataract syndrome. *Acta Haematol.* **2009**, *122*, 223–225.

23. Van de Sompele, S.; Pécheux, L.; Couso, J.; Meunier, A.; Sanchez, M.; De Baere, E. Functional characterization of a novel non-coding mutation “Ghent +49A > G” in the iron-responsive element of L-ferritin causing hereditary hyperferritinaemia-cataract syndrome. *Sci. Rep.* **2017**, *7*, 18025.
24. Gonzalez-Huerta, L.; Ramirez-Sanchez, V.; Rivera-Vega, M.; Messina-Baas, O.; Cuevas-Covarrubias, S. A family with hereditary hyperferritinaemia cataract syndrome: Evidence of incomplete penetrance and clinical heterogeneity. *Br. J. Haematol.* **2008**, *143*, 596–598.
25. Camaschella, C.; Zecchina, G.; Lockitch, G.; Roetto, A.; Campanella, A.; Arosio, P.; Levi, S. A new mutation (G51C) in the iron-responsive element (IRE) of L-ferritin associated with hyperferritinaemia-cataract syndrome decreases the binding affinity of the mutated IRE for iron-regulatory proteins. *Br. J. Haematol.* **2000**, *108*, 480–482.
26. Burdon, K.P.; Sharma, S.; Chen, C.S.; Dimasi, D.P.; Mackey, D.A.; Craig, J.E. A novel deletion in the FTL gene causes hereditary hyperferritinemia cataract syndrome (HHCS) by alteration of the transcription start site. *Hum. Mutat.* **2007**, *28*, 742.
27. Girelli, D.; Corrocher, R.; Bisceglia, L.; Olivieri, O.; Zelante, L.; Panozzo, G.; Gasparini, P. Hereditary hyperferritinemia-cataract syndrome caused by a 29-base pair deletion in the iron responsive element of ferritin L-subunit gene. *Blood* **1997**, *90*, 2084–2088.
28. (Lenzhofer, M.; Schroedl, F.; Trost, A.; Kaser-Eichberger, A.; Wiedemann, H.; Strohmaier, C.; Hohensinn, M.; Strasser, M.; Muckenthaler, M.U.; Grabner, G.; et al. Aqueous humor ferritin in hereditary hyperferritinemia cataract syndrome. *Optom. Vis. Sci.* **2015**, *92* (Suppl. 1), S40–S47.
29. Cazzola, M.; Foglieni, B.; Bergamaschi, G.; Levi, S.; Lazzarino, M.; Arosio, P. A novel deletion of the L-ferritin iron-responsive element responsible for severe hereditary hyperferritinaemia-cataract syndrome. *Br. J. Haematol.* **2002**, *116*, 667–670.
30. Garber, I.; Pudek, M. A novel deletion in the iron-response element of the L-ferritin gene, causing hyperferritinaemia cataract syndrome. *Ann. Clin. Biochem.* **2014**, *51*, 710–713.
31. Cadenas, B.; Fita-Torró, J.; Bermúdez-Cortés, M.; Hernandez-Rodriguez, I.; Fuster, J.L.; Llinares, M.E.; Galera, A.M.; Romero, J.L.; Pérez-Montero, S.; Tornador, C.; et al. L-Ferritin: One Gene, Five Diseases; from Hereditary Hyperferritinemia to Hypoferritinemia-Report of New Cases. *Pharmaceuticals* **2019**, *12*, 17.
32. Muñoz-Muñoz, J.; Cuadrado-Grande, N.; Moreno-Carralero, M.I.; Hoyos-Sanabria, B.; Manubés-Guarch, A.; González, A.F.; Tejada-Palacios, P.; Del-Castillo-Rueda, A.; Moran-Jimenez, M.J. Hereditary hyperferritinemia cataract syndrome in four patients with mutations in the IRE of the FTL gene. *Clin. Genet.* **2013**, *83*, 491–493.
33. Giansily, M.; Beaumont, C.; Desveaux, C.; Hetet, G.; Schved, J.-F.; Aguilar-Martinez, P. Denaturing gradient gel electrophoresis screening for mutations in the hereditary hyperferritinaemia cataract syndrome. *Br. J. Haematol.* **2001**, *112*, 51–54.
34. Mattila, R.; Sainio, A.; Järveläinen, M.; Pursiheimo, J.; Järveläinen, H. A novel double nucleotide variant in the ferritin-L iron-responsive element in a Finnish patient with hereditary hyperferritinaemia-cataract syndrome. *Acta Ophthalmol.* **2018**, *96*, 95–99.
